# Supplementary material for: Mayaro Virus: The Potential Role of Microbiota and Wolbachia
Source: MDPI journal article supplement (doi:10.3390/pathogens10050525), 2021-04-27
Supplement: s1 [file s1]

**Supplementary Table 1.** Primers used in the metagenomics assay.

| Primer | Adapter                   | Index        | Estabilizer  | Especific 16S rRNA   |
|--------|---------------------------|--------------|--------------|----------------------|
| 0      | CAAGCAGAAGACGGCATAACGAGAT | TCCCTTGTCTCC | AGTCAGTCAGCC | GGACTACHVGGGTWTCTAAT |
| 1      | CAAGCAGAAGACGGCATAACGAGAT | ACGAGACTGATT | AGTCAGTCAGCC | GGACTACHVGGGTWTCTAAT |
| 2      | CAAGCAGAAGACGGCATAACGAGAT | GCTGTACGGATT | AGTCAGTCAGCC | GGACTACHVGGGTWTCTAAT |
| 3      | CAAGCAGAAGACGGCATAACGAGAT | ATCACCAGGTGT | AGTCAGTCAGCC | GGACTACHVGGGTWTCTAAT |
| 4      | CAAGCAGAAGACGGCATAACGAGAT | TGGTCAACGATA | AGTCAGTCAGCC | GGACTACHVGGGTWTCTAAT |
| 5      | CAAGCAGAAGACGGCATAACGAGAT | ATCGCACAGTAA | AGTCAGTCAGCC | GGACTACHVGGGTWTCTAAT |
| 6      | CAAGCAGAAGACGGCATAACGAGAT | GTCGTGTAGCCT | AGTCAGTCAGCC | GGACTACHVGGGTWTCTAAT |
| 7      | CAAGCAGAAGACGGCATAACGAGAT | AGCGGAGGTTAG | AGTCAGTCAGCC | GGACTACHVGGGTWTCTAAT |
| 8      | CAAGCAGAAGACGGCATAACGAGAT | ATCCTTTGGTTC | AGTCAGTCAGCC | GGACTACHVGGGTWTCTAAT |
| 9      | CAAGCAGAAGACGGCATAACGAGAT | TACAGCGCATAC | AGTCAGTCAGCC | GGACTACHVGGGTWTCTAAT |
| 10     | CAAGCAGAAGACGGCATAACGAGAT | ACCGGTATGTAC | AGTCAGTCAGCC | GGACTACHVGGGTWTCTAAT |
| 11     | CAAGCAGAAGACGGCATAACGAGAT | AATTGTGTCGGA | AGTCAGTCAGCC | GGACTACHVGGGTWTCTAAT |
| 12     | CAAGCAGAAGACGGCATAACGAGAT | TGCATACACTGG | AGTCAGTCAGCC | GGACTACHVGGGTWTCTAAT |
| 13     | CAAGCAGAAGACGGCATAACGAGAT | AGTCGAACGAGG | AGTCAGTCAGCC | GGACTACHVGGGTWTCTAAT |
| 14     | CAAGCAGAAGACGGCATAACGAGAT | ACCAGTGACTCA | AGTCAGTCAGCC | GGACTACHVGGGTWTCTAAT |
| 15     | CAAGCAGAAGACGGCATAACGAGAT | GAATACCAAGTC | AGTCAGTCAGCC | GGACTACHVGGGTWTCTAAT |
| 16     | CAAGCAGAAGACGGCATAACGAGAT | GTAGATCGTGTA | AGTCAGTCAGCC | GGACTACHVGGGTWTCTAAT |
| 17     | CAAGCAGAAGACGGCATAACGAGAT | TAACGTGTGTGC | AGTCAGTCAGCC | GGACTACHVGGGTWTCTAAT |
| 18     | CAAGCAGAAGACGGCATAACGAGAT | CATTATGGCGTG | AGTCAGTCAGCC | GGACTACHVGGGTWTCTAAT |
| 19     | CAAGCAGAAGACGGCATAACGAGAT | CCAATACGCCTG | AGTCAGTCAGCC | GGACTACHVGGGTWTCTAAT |
| 20     | CAAGCAGAAGACGGCATAACGAGAT | GATCTGCGATCC | AGTCAGTCAGCC | GGACTACHVGGGTWTCTAAT |
| 21     | CAAGCAGAAGACGGCATAACGAGAT | CAGCTCATCAGC | AGTCAGTCAGCC | GGACTACHVGGGTWTCTAAT |
| 22     | CAAGCAGAAGACGGCATAACGAGAT | CAAACAACAGCT | AGTCAGTCAGCC | GGACTACHVGGGTWTCTAAT |
| 23     | CAAGCAGAAGACGGCATAACGAGAT | GCAACACCATCC | AGTCAGTCAGCC | GGACTACHVGGGTWTCTAAT |
| 24     | CAAGCAGAAGACGGCATAACGAGAT | GCGATATATCGC | AGTCAGTCAGCC | GGACTACHVGGGTWTCTAAT |
| 25     | CAAGCAGAAGACGGCATAACGAGAT | CGAGCAATCCTA | AGTCAGTCAGCC | GGACTACHVGGGTWTCTAAT |
| 26     | CAAGCAGAAGACGGCATAACGAGAT | AGTCGTGCACAT | AGTCAGTCAGCC | GGACTACHVGGGTWTCTAAT |
| 27     | CAAGCAGAAGACGGCATAACGAGAT | GTATCTGCGCGT | AGTCAGTCAGCC | GGACTACHVGGGTWTCTAAT |
| 28     | CAAGCAGAAGACGGCATAACGAGAT | CGAGGGAAAGTC | AGTCAGTCAGCC | GGACTACHVGGGTWTCTAAT |
| 29     | CAAGCAGAAGACGGCATAACGAGAT | CAAATTCGGGAT | AGTCAGTCAGCC | GGACTACHVGGGTWTCTAAT |
| 30     | CAAGCAGAAGACGGCATAACGAGAT | AGTTACGAGCTA | AGTCAGTCAGCC | GGACTACHVGGGTWTCTAAT |

\*Primer forward sequence (F) is the same for all samples:  
(AATGATACGGCGACCACCGAGATCTACACTATGGTAATTGTGTGCCAGCMGCCGCGGTAA)

**Supplementary Table 2.** Statistical analyzes of the *Aedes* sp. Microbiome from different locality - PERMANOVA analysis (D\_0 UniFrac).

| Variable |         | Groups             | Pseudo-f statistic | p-value              |
|----------|---------|--------------------|--------------------|----------------------|
| Locality |         | SC, RJ and MG      | 1.54482            | 0.10573              |
| Group 1  | Group 2 | Pseudo-f statistic | p-value            | p-value (Bonferroni) |
| SC       | RJ      | 1.43406            | 0.15376            | 0.46128              |
| SC       | MG      | 0.72792            | 0.61701            | 1.00000              |
| RJ       | MG      | 2.72587            | 0.02471            | 0.07413              |

\*SC (Santa Catarina), RJ (Rio de Janeiro) and MG (Minas Gerais).
